# Supplementary material for: Identification of prognostic factors in classic Hodgkin lymphoma by integrating whole slide imaging and next generation sequencing
Source: Royal Society of Chemistry journal article supplement (doi:10.1039/d2mo00195k), 2022-11-16
Supplement: d2mo00195k1.pdf [file d2mo00195k1.pdf]

## Supplementary Material

### IDENTIFICATION OF PROGNOSTIC FACTORS IN CLASSIC HODGKIN LYMPHOMA BY INTEGRATING WHOLE SLIDE IMAGING AND NEXT GENERATION SEQUENCING

Antonio Santisteban-Espejo<sup>1,2,3\*</sup>□, Irene Bernal-Florindo<sup>2,4,□</sup>, Jose Perez-Requena<sup>1</sup>, Lidia Atienza-Cuevas<sup>1</sup>, Inmaculada Catalina-Fernandez<sup>1</sup>, Maria del Carmen Fernandez-Valle<sup>5</sup>, Raquel Romero-Garcia<sup>2</sup>, and Marcial Garcia-Rojo<sup>1,2</sup>.

<sup>1</sup>Pathology Department. Puerta del Mar University Hospital, Cadiz, Spain.

<sup>2</sup>Institute of Research and Innovation in Biomedical Sciences of the Province of Cadiz (INiBICA).

<sup>3</sup>Department of Medicine, University of Cadiz, Cadiz, Spain

<sup>4</sup>Pathology Department, Jerez de la Frontera University Hospital, Cadiz, Spain.

<sup>5</sup>Hemathology Department, Puerta del Mar University Hospital, Cadiz, Spain.

□These authors contributed equally to this work.

\*Correspondence: [antoniosantistebanespejo@gmail.com](mailto:antoniosantistebanespejo@gmail.com)

**Supplementary Figure 1.** Workflow analysis of the sequencing process, bioinformatic analysis, and overall results.

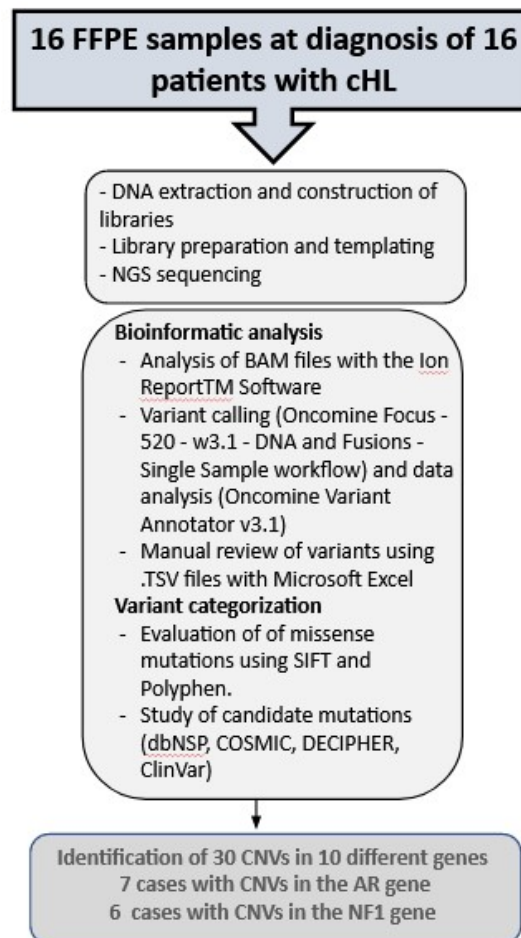

**Supplementary Table 1.** Parameters used to define color deconvolution in the algorithms MembraneQuant and NuclearQuant in the QuantCenter application (version 2.3) (3DHitech Ltd., Budapest, Hungary).

| Measurement of CD30<br>expression<br>(MembraneQuant<br>algorithm) | Measurement of CD20<br>and CD3 expression<br>(MembraneQuant<br>algorithm) | Measurement of MUM1<br>expression<br>(NuclearQuant<br>algorithm) |
|-------------------------------------------------------------------|---------------------------------------------------------------------------|------------------------------------------------------------------|
| Membrane detection                                                | Membrane detection                                                        | Nucleus detection                                                |

|                         |                         |                         |
|-------------------------|-------------------------|-------------------------|
| Blur (3) Limit (200)    | Blur (3) Limit (200)    | Blur (15) Limit (200)   |
| Sensitivity (255)       | Sensitivity (230)       | Radius (8-20)           |
| <b>Filter</b>           | <b>Filter</b>           | Area ( $\geq 100$ )     |
| Intensity (100-255)     | Intensity (0-255)       | <b>Filters</b>          |
| Area (40-300)           | Area (40-300)           | Intensity ( $\geq 50$ ) |
| <b>Nucleus</b>          | <b>Nucleus</b>          | Contrast ( $\geq 60$ )  |
| Blur (15)               | Blur (15)               |                         |
| Radius (3-8)            | Radius (3-8)            |                         |
| Area ( $\geq 10$ )      | Area ( $\geq 10$ )      |                         |
| <b>Filters</b>          | <b>Filters</b>          |                         |
| Intensity ( $\geq 60$ ) | Intensity ( $\geq 60$ ) |                         |
| Contrast ( $\geq 60$ )  | Contrast ( $\geq 60$ )  |                         |

**Supplementary Table 2.** Filtered copy number variants (CNVs) in cHL.

| Case number | Gene (mean copy number) | Cytoband                      | Confidence interval | CNV p-value |
|-------------|-------------------------|-------------------------------|---------------------|-------------|
| 1           | NF1 (4.08)              | 17q11.2(29422233-29685527)    | 5%:2.7, 95%:5.86    | 0.007553    |
|             | AR (3.94) */**          | Xq12(66776186-66945230)       | 5%:3.23, 95%:4.77   | 0           |
|             | MED12 (3.06)            | Xq13.1(70339117-70349268)     | 5%:1.82, 95%:4.84   | 0.001343    |
| 2           | FGFR2 (7.7) **          | 10q26.13(123247505-123354466) | 5%:4.47, 95%:11.77  | 0.001292    |

|          |               |                                   |                       |          |
|----------|---------------|-----------------------------------|-----------------------|----------|
|          | NF1 (8.95)    | 17q11.2(29422233-<br>29685527)    | 5%:3.77,<br>95%:16.41 | 0.01721  |
|          | CDK4 (5.7)    | 12q14.1(58142052-<br>58146026)    | 5%:2.88,<br>95%:9.25  | 0.02549  |
| <b>3</b> | KRAS (0)      | 12p12.1(25364761-<br>25400274)    | 5%:0, 95%:1.21        | 0.02638  |
|          | CDK4 (5.15)   | 12q14.1(58142052-<br>58146026)    | 5%:2.55, 95%:8.4      | 0.04025  |
|          | FGFR2 (6.95)  | 10q26.13(123247505-<br>123354466) | 5%:3.99,<br>95%:10.64 | 0.002621 |
|          | NF1 (8.3)     | 17q11.2(29422233-<br>29685527)    | 5%:3.5,<br>95%:15.11  | 0.02101  |
| <b>4</b> | CCND1 (0)     | 11q13.3(69456942-<br>69467039)    | 5%:0, 95%:1.4         | 0.02819  |
|          | NF1 (7.8)     | 17q11.2(29422233-<br>29685527)    | 5%:3.89, 95%:13       | 0.008046 |
| <b>5</b> | AR (5.9) **   | Xq12(66776186-<br>66945230)       | 5%:3.09,<br>95%:9.36  | 0.001647 |
|          | BIRC2 (11.1)  | 11q22.2(102234187-<br>102248277)  | 5%:3.36,<br>95%:21.65 | 0.04601  |
| <b>6</b> | AR (4.8)      | Xq12(66776186-<br>66945230)       | 5%:3.05,<br>95%:6.94  | 0.004492 |
| <b>7</b> | None detected |                                   |                       |          |
| <b>8</b> | PIK3CA (0)    | 3q26.32(178916683-<br>178916683)  | 5%:0, 95%:0.22        | 0.003195 |

|           |                         |                                  |                       |          |
|-----------|-------------------------|----------------------------------|-----------------------|----------|
|           |                         | 178952097)                       |                       |          |
|           | KIT (0)                 | 4q12(55529117-<br>55599362)      | 5%:0, 95%:1.1         | 0.02359  |
|           | KRAS (0)                | 12p12.1(25364761-<br>25400274)   | 5%:0, 95%:0.73        | 0.01281  |
|           | CDK4 (5.8)              | 12q14.1(58142052-<br>58146026)   | 5%:3, 95%:9.14        | 0.02148  |
|           | NF1 (7.33)              | 17q11.2(29422233-<br>29685527)   | 5%:2.75,<br>95%:13.41 | 0.04989  |
| <b>9</b>  | AR (6.8)                | Xq12(66776186-<br>66945230)      | 5%:3.04,<br>95%:11.23 | 0.03161  |
|           | NF1 (9.9)               | 17q11.2(29422233-<br>29685527)   | 5%:3.24,<br>95%:18.64 | 0.045    |
| <b>10</b> | Read_count <<br>100,000 |                                  |                       |          |
| <b>11</b> | None detected           |                                  |                       |          |
| <b>12</b> | KRAS (0)                | 12p12.1(25364761-<br>25400274)   | 5%:0, 95%:0           | 0.003727 |
|           | PIK3CA (0)              | 3q26.32(178916683-<br>178952097) | 5%:0, 95%:0           | 0.001038 |
|           | AR (7.9)                | Xq12(66776186-<br>66945230)      | 5%:2.95,<br>95%:14.03 | 0.04624  |
| <b>13</b> | AR (19.0)               | Xq12(66776186-<br>66945230)      | 5%:4.21,<br>95%:37.89 | 0.04033  |
| <b>13</b> | CDK4 (39.5)             | 12q14.1(58142052-                | 5%:8.32,              | 0.04062  |

|    |              |                     |           |         |
|----|--------------|---------------------|-----------|---------|
|    |              | 58146026)           | 95%:79.82 |         |
| 14 | NF1 (4.38)   | 17q11.2(29422233-   | 5%:2.66,  | 0.01473 |
|    |              | 29685527)           | 95%:6.73  |         |
| 15 | FGFR2 (2.74) | 10q26.13(123247505- | 5%:2.24,  | 0.01093 |
|    |              | 123354466)          | 95%:3.36  |         |
| 16 | CDK4 (10.9)  | 12q14.1(58142052-   | 5%:4.75,  | 0.01174 |
|    |              | 58146026)           | 95%:18.71 |         |

<sup>1</sup> \*Filtered out since gene gain was less than 2 over normal for CNV calling. \*\* Marked as “Amplification. Gain-of-function” by Ion Reporter.

**Supplementary Table 3.** Results of the correlation analysis between CD30+,CD20+, CD3+ and MUM1+ cell percentages quantified by whole-slide imaging in classic Hodgkin lymphoma.

|                             | <b>%CD30<br/>positivity</b>       | <b>%CD20<br/>positivity</b>       | <b>%CD3<br/>positivity</b>        | <b>%MUM1<br/>positivity</b>       |
|-----------------------------|-----------------------------------|-----------------------------------|-----------------------------------|-----------------------------------|
| <b>%CD30<br/>positivity</b> | 1                                 | $\rho=0.391$<br>( $p=0.134$ )     | $\rho=0.238$<br>( $p=0.374$ )     | $\rho= (-0.059)$<br>( $p=0.829$ ) |
| <b>%CD20<br/>positivity</b> | $\rho=0.391$<br>( $p=0.134$ )     | 1                                 | $\rho=0.094$<br>( $p=0.729$ )     | $\rho= (-0.141)$<br>( $p=0.602$ ) |
| <b>%CD3<br/>positivity</b>  | $\rho=0.238$<br>( $p=0.374$ )     | $\rho=0.094$<br>( $p=0.729$ )     | 1                                 | $\rho= (-0.109)$<br>( $p=0.688$ ) |
| <b>%MUM1<br/>positivity</b> | $\rho= (-0.059)$<br>( $p=0.829$ ) | $\rho= (-0.141)$<br>( $p=0.602$ ) | $\rho= (-0.109)$<br>( $p=0.688$ ) | 1                                 |
